# Supplementary material for: Synthesis and 11C-Radiolabelling of 2-Carboranyl Benzothiazoles
Source: MDPI journal article supplement (doi:10.3390/molecules20057495), 2015-04-23
Supplement: s1 [file s1]

## Supplementary Materials

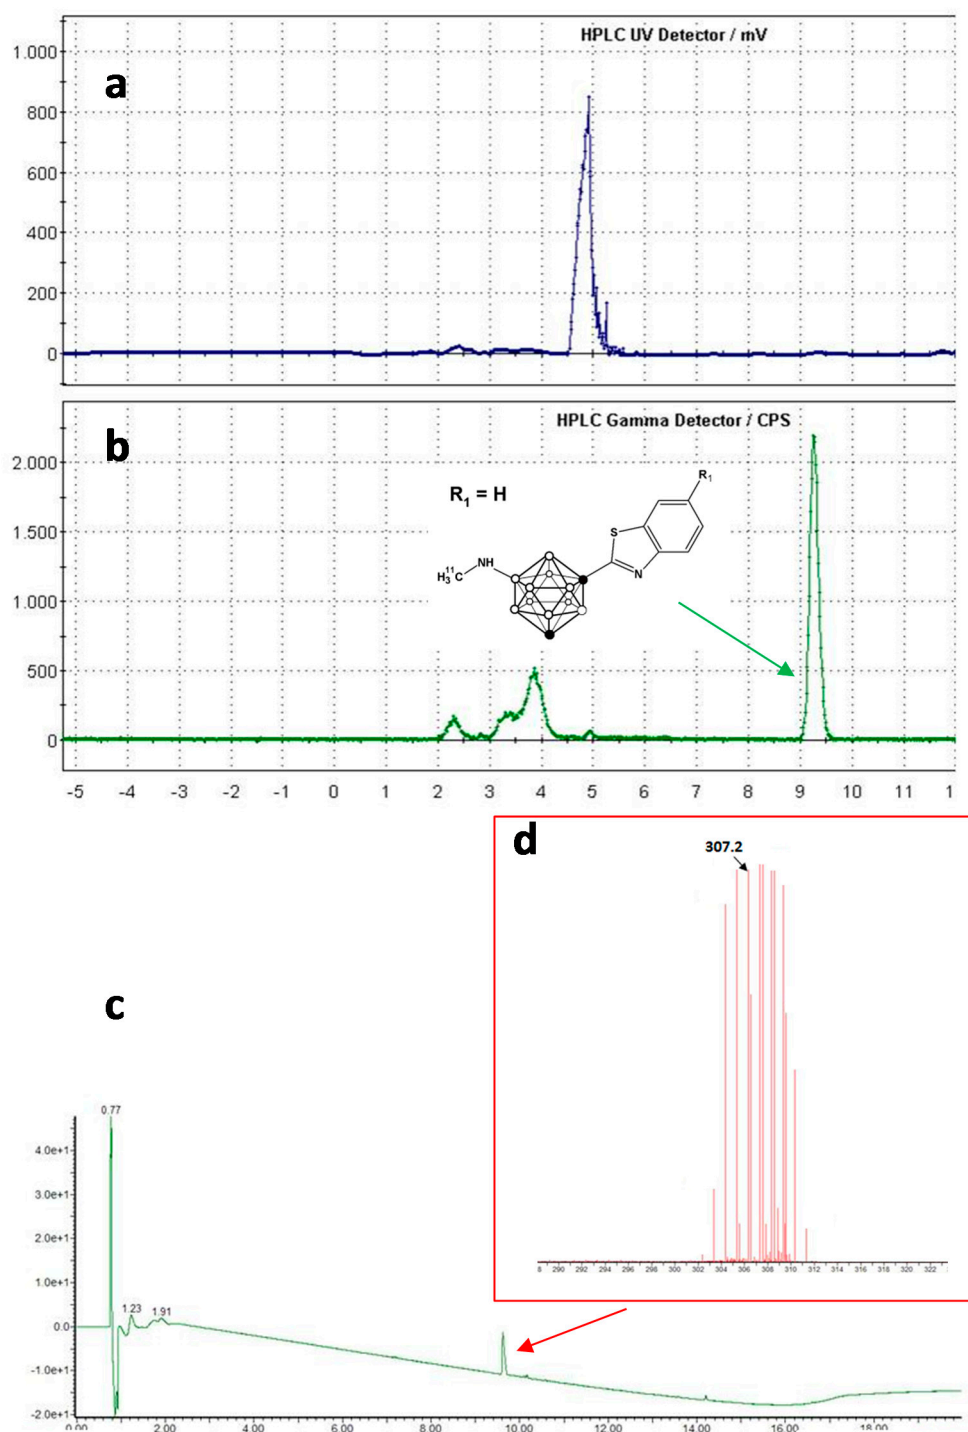

**Figure S1.** (a,b) Chromatographic profiles corresponding to the purification of  $[^{11}\text{C}]\mathbf{15}$ : (a) UV detector and (b) radiometric detector. The collected fraction is indicated with an arrow in the radiometric profile; (c) chromatographic profile corresponding to LC-MS analysis of pure  $[^{11}\text{C}]\mathbf{15}$  after complete decay; (d) MS spectrum for maximum intensity peak.

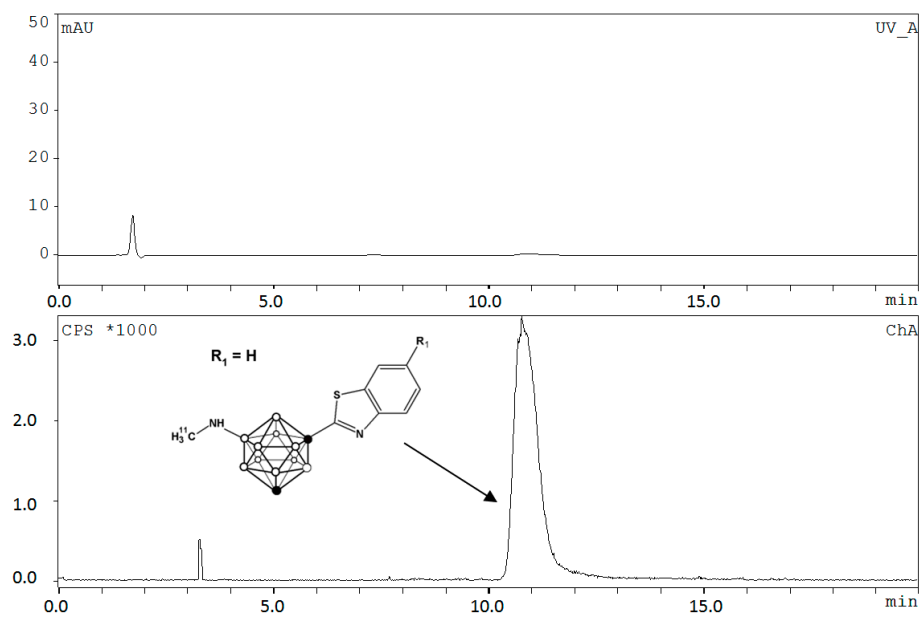

**Figure S2.** Chromatographic profiles corresponding to the quality control of  $[^{11}\text{C}]15$ : UV detector (top) and radiometric detector (bottom).

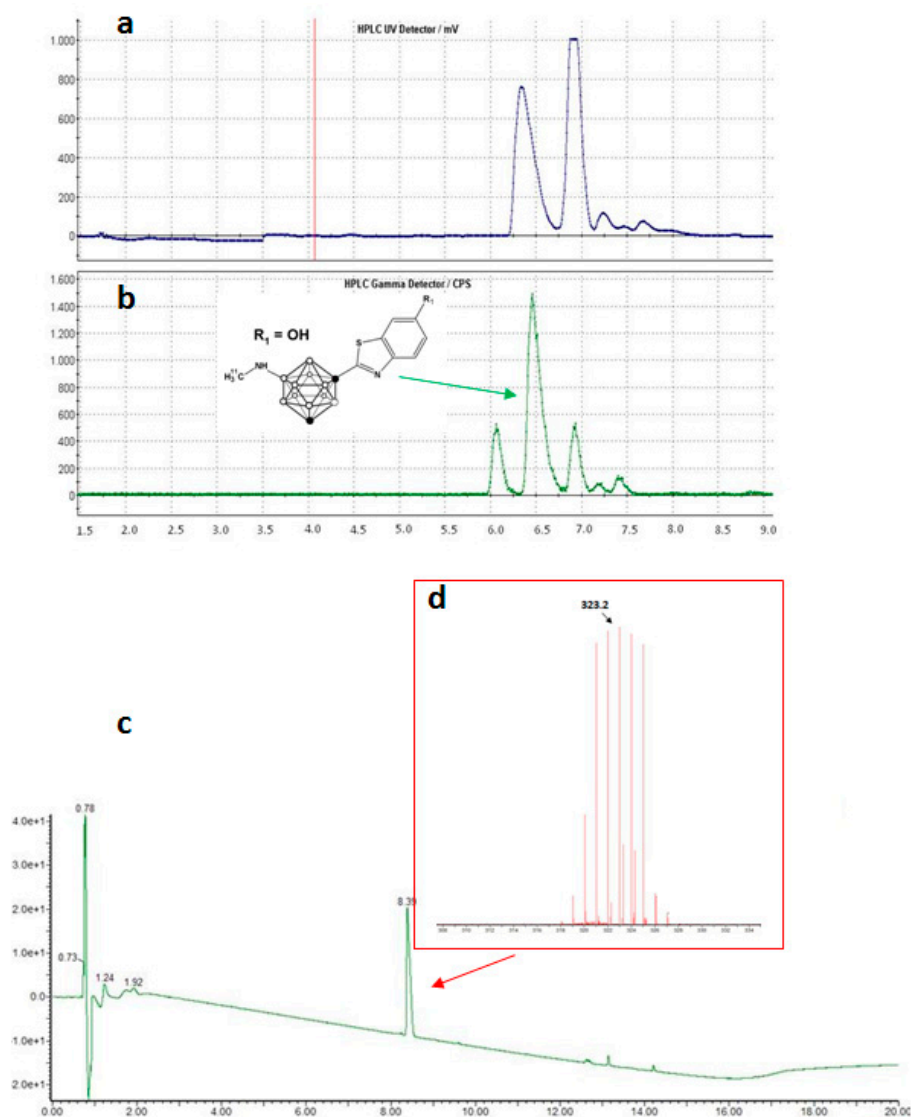

**Figure S3.** (a,b) Chromatographic profiles corresponding to the purification of  $[^{11}\text{C}]\mathbf{16}$ : (a) UV detector and (b) radiometric detector. The collected fraction is indicated with an arrow in the radiometric profile; (c) chromatographic profile corresponding to LC-MS analysis of pure  $[^{11}\text{C}]\mathbf{16}$  after complete decay; (d) MS spectrum for maximum intensity peak.

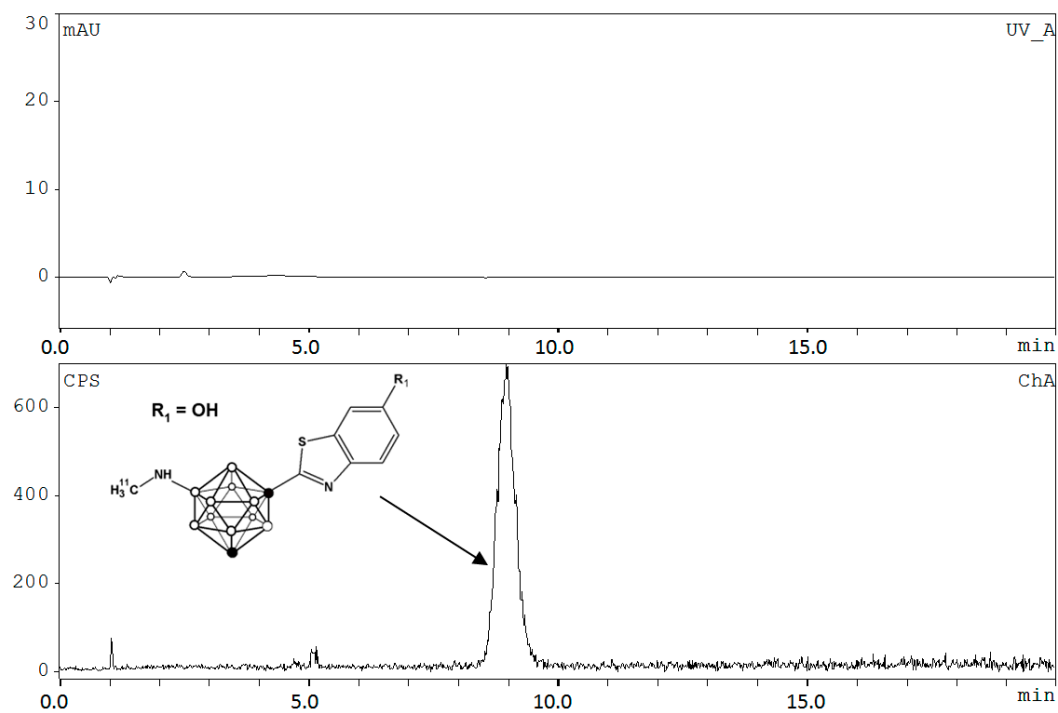

**Figure S4.** Chromatographic profiles corresponding to the quality control of  $[^{11}\text{C}]16$ : UV detector (top) and radiometric detector (bottom).
